# Supplementary material
Source: MDPI journal article supplement (https://www.mdpi.com/2504-5377/6/2/28)
Supplement: s1 [file s1]

## Supporting information

### Impact of polymer nanoparticles on DPPC monolayer properties

Alexey Bykov <sup>1,\*</sup>, Olga Milyaeva <sup>1</sup>, Alexander Akentiev <sup>1</sup>, Maria Panaeva <sup>1</sup>, Nikolaj Isakov <sup>1</sup>, Reinhard Miller <sup>2</sup> and Boris Noskov <sup>1</sup>

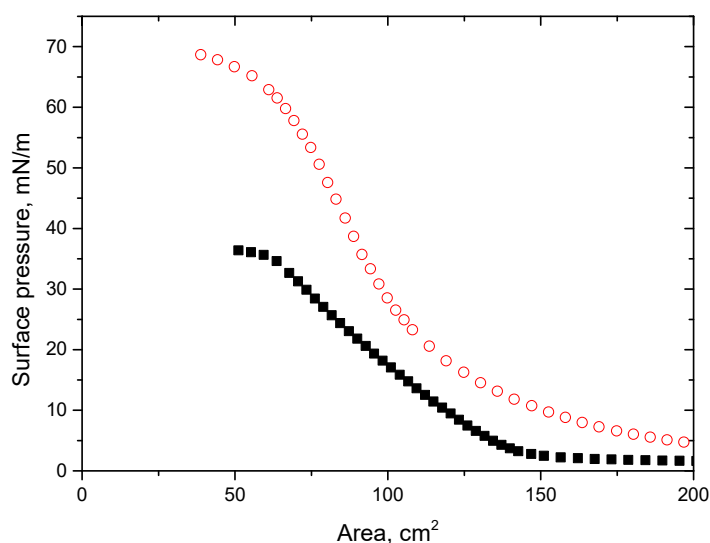

Figure S1. Compression isotherms of PSA nanoparticles at the surface of 0.01 M (black circles) and 0.1 M (red squares) NaCl solutions.

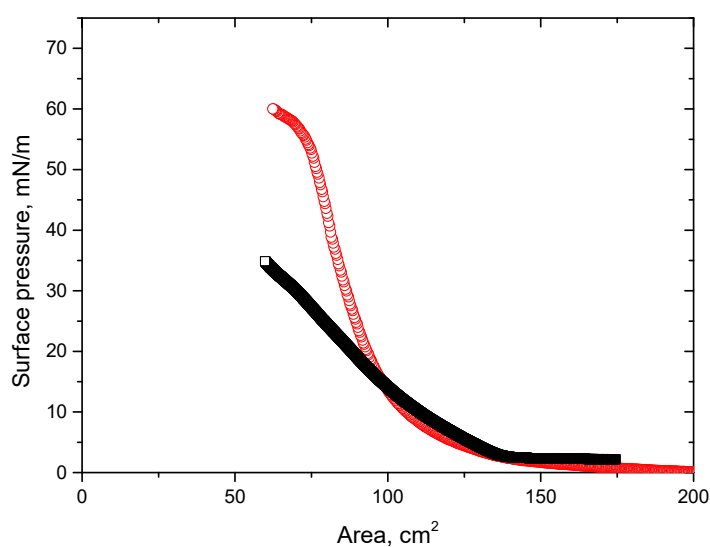

Figure S2. Compression isotherms of PSC nanoparticles at the surface of 0.01 M (black circles) and 0.1 M (red squares) NaCl solutions.

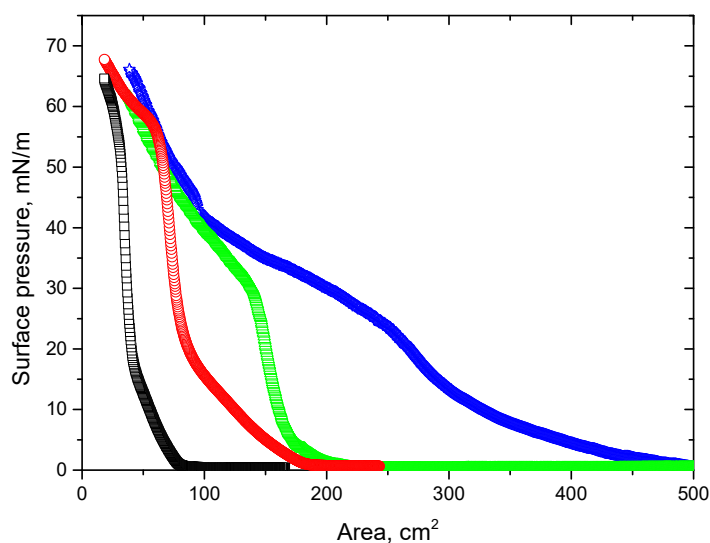

Figure S3. Compression isotherms for PSC nanoparticles on the surface of 0.1M NaCl solution when 200  $\mu\text{L}$  (green triangles) and 400  $\mu\text{L}$  (blue asterisks) of the dispersion were spread at the air-water interface. Compression isotherms for PSA microparticles (with diameter 1  $\mu\text{m}$ ) on the surface of 0.01M NaCl solution when 200  $\mu\text{L}$  (black squares) and 400  $\mu\text{L}$  (red circles) of the dispersion were spread at the air-water interface. Data for PSA microparticles are taken from ref. [35]. Data have been discussed in this reference.

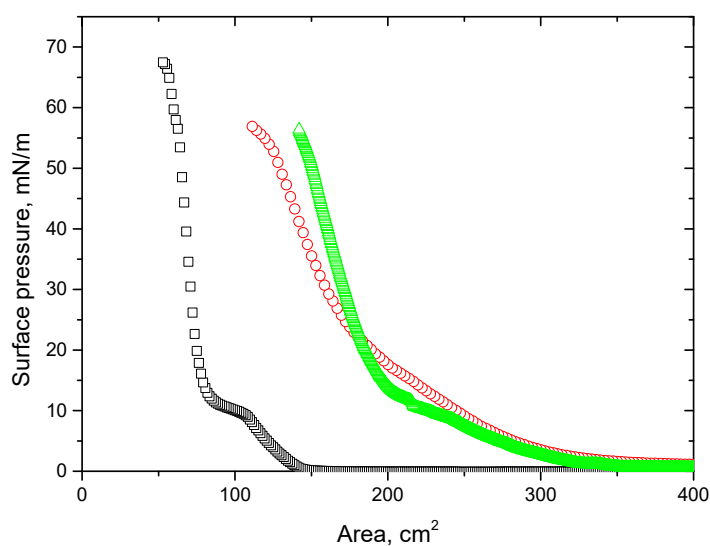

Figure S4. Compression isotherms for pure DPPC (open black squares), DPPC/PSA (red circles) and DPPC/PSC (green triangles) monolayers at the surface 0.1M NaCl. The approximate ratio of DPPC to nanoparticles surface coverage is 1:1.
